# Supplementary material for: Instantaneous room-temperature and highly enantioselective ArTi(O-i-Pr)3 additions to aldehydes
Source: Royal Society of Chemistry journal article supplement (doi:10.1039/c1cc15059f), 2011-01-01
Supplement: c1cc15059f.pdf [file c1cc15059f.pdf]

## Electronic Supplementary Information

### Instantaneous Room-Temperature and Highly Enantioselective $\text{ArTi}(\text{O-}i\text{-Pr})_3$

#### Additions to Aldehydes for the Synthesis of Diarylmethanols

Kuo-Hui Wu,<sup>a</sup> Shuangliu Zhou,<sup>a,b</sup> Chien-An Chen,<sup>a</sup> Mao-Chi Yang,<sup>a</sup> Ruei-Tang Chiang,<sup>a</sup>

Chi-Ren Chen<sup>a</sup> and Han-Mou Gau\*<sup>a</sup>

<sup>a</sup> Department of Chemistry, National Chung Hsing University, Taichung 402, Taiwan

<sup>b</sup> Anhui Key Laboratory of Functional Molecular Solids, College of Chemistry and Materials  
Science, Anhui Normal University, Wuhu, Anhui 241000, China

E-mail: [hmgau@dragon.nchu.edu.tw](mailto:hmgau@dragon.nchu.edu.tw)

## Table of Contents

|             |                                                                                                                                                                                                  |     |
|-------------|--------------------------------------------------------------------------------------------------------------------------------------------------------------------------------------------------|-----|
| <b>I.</b>   | <b>Experimental Section</b>                                                                                                                                                                      | S3  |
| <b>I.1</b>  | <b>General Remarks</b>                                                                                                                                                                           | S3  |
| <b>I.2</b>  | <b>General Procedures for the Synthesis of ArTi(O-<i>i</i>-Pr)<sub>3</sub></b>                                                                                                                   | S3  |
| <b>I.3</b>  | <b>General Procedures for the Asymmetric ArTi(O-<i>i</i>-Pr)<sub>3</sub> Addition<br/>Reaction of Aldehydes</b>                                                                                  | S3  |
| <b>II.</b>  | <b>Reaction Conditions, HPLC Conditions and Chromatograms, <sup>1</sup>H and<br/><sup>13</sup>C NMR Spectroscopic Data of ArTi(O-<i>i</i>-Pr)<sub>3</sub> Addition Products of<br/>Aldehydes</b> | S4  |
| II.1.       | ( <i>R</i> )-(2-Methyl-phenyl)-phenyl-methanol (( <i>R</i> )- <b>9a</b> )                                                                                                                        | S4  |
| II.2.       | ( <i>R</i> )-(4-Methyl-phenyl)-phenyl-methanol (( <i>R</i> )- <b>9b</b> )                                                                                                                        | S5  |
| II.3.       | ( <i>R</i> )-(2-Methoxyphenyl)-phenyl-methanol (( <i>R</i> )- <b>9c</b> )                                                                                                                        | S6  |
| II.4.       | ( <i>R</i> )-(3-Methoxy-phenyl)-phenyl-methanol (( <i>R</i> )- <b>9d</b> )                                                                                                                       | S7  |
| II.5.       | ( <i>R</i> )-(4-Methoxy-phenyl)-phenyl-methanol (( <i>R</i> )- <b>9e</b> )                                                                                                                       | S8  |
| II.6.       | ( <i>R</i> )-Naphthalen-1-yl-phenyl-methanol (( <i>R</i> )- <b>9f</b> )                                                                                                                          | S9  |
| II.7.       | ( <i>R</i> )-Naphthalen-2-yl-phenyl-methanol (( <i>R</i> )- <b>9g</b> )                                                                                                                          | S10 |
| II.8.       | ( <i>R</i> )-(2-Chloro-phenyl)-phenyl-methanol (( <i>R</i> )- <b>9h</b> )                                                                                                                        | S11 |
| II.9.       | ( <i>R</i> )-(3-Chloro-phenyl)-phenyl-methanol (( <i>R</i> )- <b>9i</b> )                                                                                                                        | S12 |
| II.10.      | ( <i>R</i> )-(4-Chloro-phenyl)-phenyl-methanol (( <i>R</i> )- <b>9j</b> )                                                                                                                        | S13 |
| II.11.      | ( <i>R</i> )-Phenyl-(4-trifluoromethylphenyl)-methanol (( <i>R</i> )- <b>9k</b> )                                                                                                                | S14 |
| II.12.      | ( <i>S</i> )-( <i>E</i> )-1,3-Diphenyl-prop-2-en-1-ol (( <i>S</i> )- <b>9l</b> )                                                                                                                 | S15 |
| II.13.      | ( <i>R</i> )-(Furan-2-yl)-phenyl-methanol (( <i>R</i> )- <b>9m</b> )                                                                                                                             | S16 |
| II.14.      | ( <i>S</i> )-1-Phenyl-pentan-1-ol (( <i>S</i> )- <b>9n</b> )                                                                                                                                     | S17 |
| II.15.      | ( <i>S</i> )-2-methyl-1-phenyl-propan-1-ol (( <i>S</i> )- <b>9o</b> )                                                                                                                            | S18 |
| II.16.      | ( <i>S</i> )-2,2-Dimethyl-1-phenyl-propan-1-ol (( <i>S</i> )- <b>9p</b> )                                                                                                                        | S19 |
| II.17.      | ( <i>S</i> )-(4-Methyl-phenyl)-phenyl-methanol (( <i>S</i> )- <b>9b</b> )                                                                                                                        | S20 |
| II.18.      | ( <i>S</i> )-(4-Methoxy-phenyl)-phenyl-methanol (( <i>S</i> )- <b>9e</b> )                                                                                                                       | S21 |
| II.19.      | ( <i>S</i> )-(Naphthalen-2-yl)-phenyl-methanol (( <i>S</i> )- <b>9g</b> )                                                                                                                        | S22 |
| II.20.      | ( <i>S</i> )-(4-Chloro-phenyl)-phenyl-methanol (( <i>S</i> )- <b>9l</b> )                                                                                                                        | S23 |
| II.21.      | ( <i>S</i> )-(4-bromo-phenyl)-phenyl-methanol (( <i>S</i> )- <b>9q</b> )                                                                                                                         | S24 |
| <b>III.</b> | <b>Linear Effect Study of PhTi(O-<i>i</i>-Pr)<sub>3</sub> Additions to 2-Naphthylaldehyde<br/>Catalyzed by <i>rac</i>-H<sub>8</sub>-BINOL or <i>x</i> mol% (<i>R</i>)-H<sub>8</sub>-BINOL</b>    | S25 |
| III.1.      | HPLC Conditions and Chromatograms of Linear Effect Study                                                                                                                                         | S25 |
| III.2.      | Ee Values of ( <i>R</i> )- <b>9g</b> of the Linear Effect Study                                                                                                                                  | S26 |
| III.3.      | The Reaction Condition and HPLC Chromatogram of the Autocatalysis<br>Study                                                                                                                       | S26 |
| <b>IV.</b>  | <b>References</b>                                                                                                                                                                                | S27 |

## I. Experimental Section

**I.1. General Remarks.**  $\text{ArTi}(\text{O-}i\text{-Pr})_3$ ,<sup>1</sup> (1*R*,2*R*)-*N,N'*-bis(trifluoromethylsulfonyl)-1,2-cyclohexanediamine (2),<sup>2</sup> 1,2:5,6-di-*O*-isopropylidene-*D*-mannitol (3),<sup>3</sup>  $\alpha,\alpha,\alpha',\alpha'$ -tetraphenyl-2,2-dimethyl-1,3-dioxolane-4,5-dimethanol (4),<sup>4</sup> and  $[\text{Ti}\{\text{H}_8\text{-}(R)\text{-BINOLate}\}(\text{O-}i\text{-Pr})_2]_x$  ((*R*)-7)<sup>5</sup> were prepared according to literature procedures.  $\text{Ti}(\text{O-}i\text{-Pr})_4$  was freshly distilled prior to use. (*S*)-BINOL ((*S*)-5) and (*R*)-H<sub>8</sub>-BINOL ((*R*)-6) were obtained commercially. All syntheses and manipulations were carried out under a dry nitrogen atmosphere using standard Schlenk techniques or in a glovebox. Solvents were dried by refluxing for at least 24 h over P<sub>2</sub>O<sub>5</sub> (dichloromethane) or sodium/benzophenone (THF, *n*-hexane or toluene) and were freshly distilled prior to use. <sup>1</sup>H NMR spectra were obtained with a Varian Mercury-400 (400 MHz) spectrometer, and <sup>13</sup>C NMR spectra were recorded with the Varian Mercury-400 (100.70 MHz). <sup>1</sup>H and <sup>13</sup>C chemical shifts were measured relative to TMS as the internal reference.

**I.2. General Procedures for the Synthesis of  $\text{ArTi}(\text{O-}i\text{-Pr})_3$ .**<sup>1</sup> A 2-necked 250 mL round-bottomed flask equipped with a condenser, a magnetic stir bar and an addition funnel was charged magnesium turning (2.40 g, 100 mmol). Under a nitrogen atmosphere, 100 mL THF was added to the flask and aryl bromide (120 mmol) in 50 mL THF was transferred into the addition funnel. The THF solution of aryl bromide was added slowly to the reaction flask, and the reaction mixture was controlled under gentle refluxing using an ice-bath if necessary. After the reaction completed, the resulted Grignard reagent was cooled to 0 °C. In another 2-necked 500 mL round-bottomed flask under a nitrogen atmosphere, a solution of  $\text{Ti}(\text{O-}i\text{-Pr})_4$  (22.4 mL, 75.0 mmol) in 50 mL THF at 0 °C was added  $\text{TiCl}_4$  (2.8 mL, 25.0 mmol). The resulted solution was warmed to room temperature and stirred for 30 min, giving a  $\text{ClTi}(\text{O-}i\text{-Pr})_3$  solution (100 mmol). The  $\text{ClTi}(\text{O-}i\text{-Pr})_3$  solution was cooled to 0 °C, and, to this solution, the ice-cold Grignard solution was transferred via a cannula. The reaction mixture was warmed to room temperature and was allowed to react for 3 h. The volatile material was removed completely under reduced pressures, and, under a nitrogen atmosphere, the residue was extracted with *n*-hexane (3 × 200 mL). The combined hexane solution was concentrated and was cooled to -20 °C, furnishing crystalline product of the  $\text{ArTi}(\text{O-}i\text{-Pr})_3$ .

**I.3. General Procedures for the Asymmetric  $\text{ArTi}(\text{O-}i\text{-Pr})_3$  Addition Reaction of Aldehydes.** Under a dry nitrogen atmosphere,  $[\{(R)\text{-H}_8\text{-BINOLate}\}\text{Ti}(\text{O-}i\text{-Pr})_2]_x$  (0.0230 g, 0.0500 mmol) and  $\text{ArTi}(\text{O-}i\text{-Pr})_3$  (0.600 mmol) were dissolved in 3 mL of dry THF at room temperature followed by an addition of an aldehyde (0.50 mmol) in 1 mL THF. The mixture was reacted at room temperature for 1 min and quenched with 2 M NaOH (1 mL). The aqueous phase was extracted with ethyl acetate (3 × 10 mL), and the combined organic phase was dried over  $\text{MgSO}_4$ , filtered and concentrated. The residue was purified by column chromatography to give the secondary alcohol. Enantiomeric excesses of products were determined by HPLC using suitable chiral columns.

## II. Reaction Conditions, HPLC Conditions and Chromatograms, $^1\text{H}$ and $^{13}\text{C}$ NMR Spectroscopic Data of $\text{ArTi}(\text{O-}i\text{-Pr})_3$ Addition Products of Aldehydes

### II.1. (*R*)-(2-Methyl-phenyl)-phenyl-methanol (*R*-9a) (Table 2, entry 1):<sup>6</sup>

|                                                                                   |                 |                                             |
|-----------------------------------------------------------------------------------|-----------------|---------------------------------------------|
| 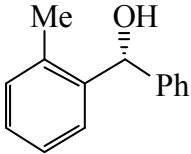 | Column:         | Chiralcel OB-H,                             |
|                                                                                   | Eluent:         | Hexane/IPA = 94/6                           |
|                                                                                   | Flow rate:      | 1 mL/min                                    |
|                                                                                   | Detector:       | UV, 254 nm                                  |
|                                                                                   | Retention time: | 9.3 min ( <i>R</i> ), 11.1 min ( <i>S</i> ) |

| Racemic standard                                                                   |         |         | Catalytic Reaction Product                                                          |           |         |
|------------------------------------------------------------------------------------|---------|---------|-------------------------------------------------------------------------------------|-----------|---------|
| 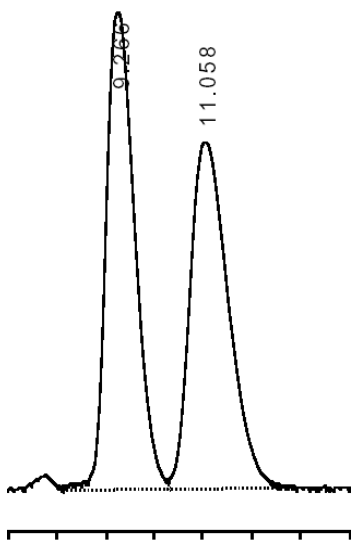 |         |         |  |           |         |
| Peak No.                                                                           | 1       | 2       | Peak No.                                                                            | 1         | 2       |
| Time                                                                               | 9.266   | 11.058  | Time                                                                                | 9.018     | 11.951  |
| Height(mAU)                                                                        | 45759   | 33122   | Height(mAU)                                                                         | 116.064   | 0.8067  |
| Area(mAU-s)                                                                        | 1752158 | 1714148 | Area(mAU-s)                                                                         | 6954.3242 | 45.0987 |
| Area%                                                                              | 50.548  | 49.451  | Area%                                                                               | 99.3557   | 0.6443  |

#### Catalytic Reaction Conditions:

2-methylbenzaldehyde: 0.50 mmol,  $[\text{Ti}\{(R)\text{-H}_8\text{-BINOLate}\}(\text{O-}i\text{-Pr})_2]_x$ : 0.050 mmol,  
 $\text{PhTi}(\text{O-}i\text{-Pr})_3$ : 0.60 mmol, rt, THF: 4 mL, 1 min

#### Spectrum Data:

$^1\text{H}$  NMR (400 MHz,  $\text{CDCl}_3$ ):  $\delta$  7.47-7.45 (m, 1H), 7.28-7.10 (m, 8H), 5.88 (s, 1H), 2.56 (br, 1H), 2.18 (s, 3H) ppm.

$^{13}\text{C}\{^1\text{H}\}$  NMR (100 MHz,  $\text{CDCl}_3$ ):  $\delta$  142.8, 141.4, 135.2, 130.4, 128.3, 127.42, 127.37, 127.0, 126.2, 126.0, 73.2, 19.3 ppm.

**II.2. (*R*)-(4-Methyl-phenyl)-phenyl-methanol (9b) (Table 2, entry 2):<sup>6,7</sup>**

|  |                 |                                                 |
|--|-----------------|-------------------------------------------------|
|  | Column:         | Chiralcel OB-H                                  |
|  | Eluent:         | Hexane/IPA = 95/5                               |
|  | Flow rate:      | 1 mL/min                                        |
|  | Detector:       | UV, 254 nm                                      |
|  | Retention time: | 9.839 min ( <i>R</i> ), 12.305 min ( <i>S</i> ) |

| Racemic standard |          |          | Catalytic Reaction Product |           |          |
|------------------|----------|----------|----------------------------|-----------|----------|
|                  |          |          |                            |           |          |
| Peak No.         | 1        | 2        | Peak No.                   | 1         | 2        |
| Time             | 9.839    | 12.305   | Time                       | 9.526     | 13.647   |
| Height(mAU)      | 33.884   | 24.974   | Height(mAU)                | 127.0562  | 3.8227   |
| Area(mAU-s)      | 1163.255 | 1124.632 | Area(mAU-s)                | 4767.7788 | 155.1563 |
| Area%            | 50.844   | 49.156   | Area%                      | 96.8483   | 3.1517   |

**Catalytic Reaction Conditions:**

4-methylbenzaldehyde: 0.50 mmol, [Ti{(*R*)-H<sub>8</sub>-BINOLate}(O-*i*-Pr)<sub>2</sub>]<sub>x</sub>: 0.050 mmol,  
 PhTi(O-*i*-Pr)<sub>3</sub>: 0.60 mmol, rt, THF: 4 mL, 1 min.

**Spectrum Data:**

<sup>1</sup>H NMR (400 MHz, CDCl<sub>3</sub>): δ 7.32-7.09 (m, 9H), 5.69 (s, 1H), 2.51 (br, 1H), 2.29 (s, 3H)  
 ppm.

<sup>13</sup>C{<sup>1</sup>H} NMR (100 MHz, CDCl<sub>3</sub>): δ 144.3, 141.3, 137.5, 129.5, 128.7, 127.7, 126.9, 126.8, 76.3,  
 21.4 ppm.

### II.3. (*R*)-(2-Methoxyphenyl)-phenyl-methanol (**9c**) (Table 2, entry 3):<sup>6,7</sup>

|                                                                                   |                 |                                                  |
|-----------------------------------------------------------------------------------|-----------------|--------------------------------------------------|
| 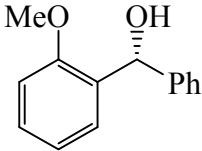 | Column:         | Chiralcel OJ                                     |
|                                                                                   | Eluent:         | Hexane/IPA = 90/10                               |
|                                                                                   | Flow rate:      | 1 mL/min                                         |
|                                                                                   | Detector:       | UV, 254 nm                                       |
|                                                                                   | Retention time: | 13.794 min ( <i>R</i> ), 15.893 min ( <i>S</i> ) |

| Racemic standard                                                                   |            |            | Catalytic Reaction Product                                                          |           |           |
|------------------------------------------------------------------------------------|------------|------------|-------------------------------------------------------------------------------------|-----------|-----------|
| 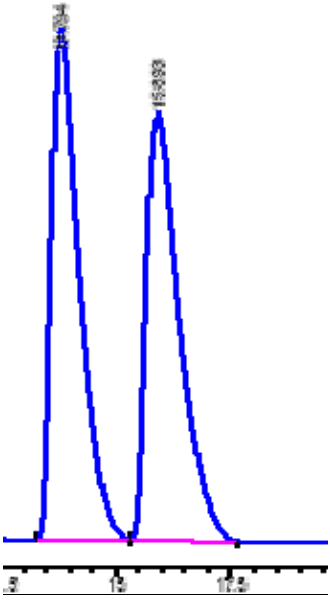 |            |            |  |           |           |
| Peak No.                                                                           | 1          | 2          | Peak No.                                                                            | 1         | 2         |
| Time                                                                               | 13.794     | 15.893     | Time                                                                                | 13.463    | 15.949    |
| Height(mAU)                                                                        | 67.91636   | 56.82853   | Height(mAU)                                                                         | 245.97577 | 19.37109  |
| Area(mAU-s)                                                                        | 2843.10132 | 2820.24780 | Area(mAU-s)                                                                         | 1.31814e4 | 736.16962 |
| Area%                                                                              | 50.2018    | 49.7982    | Area%                                                                               | 94.7105   | 5.2895    |

#### Catalytic Reaction Conditions:

2-methoxybenzaldehyde: 0.50 mmol, [Ti{(R)-H<sub>8</sub>-BINOLate}(O-*i*-Pr)<sub>2</sub>]<sub>x</sub>: 0.050 mmol,  
 PhTi(O-*i*-Pr)<sub>3</sub>: 0.60 mmol, rt, THF: 4 mL, 1 min.

#### Spectrum Data:

<sup>1</sup>H NMR (400 MHz, CDCl<sub>3</sub>): δ 7.41-7.21 (m, 7H), 6.97-6.89 (m, 2H), 6.07 (d, *J* = 13.2 Hz, 1H), 3.82 (s, 3H), 3.06 (d, *J* = 5.6 Hz, 1H) ppm.

<sup>13</sup>C{<sup>1</sup>H} NMR (100 MHz, CDCl<sub>3</sub>): δ 156.8, 143.3, 132.0, 128.7, 128.2, 127.9, 127.2, 126.6, 120.8, 110.8, 72.3, 55.4 ppm.

#### II.4. (*R*)-(3-Methoxy-phenyl)-phenyl-methanol ((*R*)-9d) (Table 2, entry 4):<sup>6</sup>

|                                                                                   |                 |                                              |
|-----------------------------------------------------------------------------------|-----------------|----------------------------------------------|
| 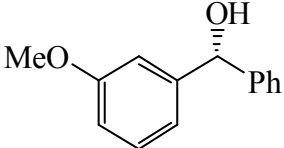 | Column:         | Chiralcel OD                                 |
|                                                                                   | Eluent:         | Hexane/IPA = 90/10                           |
|                                                                                   | Flow rate:      | 1 mL/min                                     |
|                                                                                   | Detector:       | UV, 254 nm                                   |
|                                                                                   | Retention time: | 11.9 min ( <i>S</i> ), 17.2 min ( <i>R</i> ) |

| Racemic standard                                                                   |           |           | Catalytic Reaction Product                                                          |          |           |
|------------------------------------------------------------------------------------|-----------|-----------|-------------------------------------------------------------------------------------|----------|-----------|
| 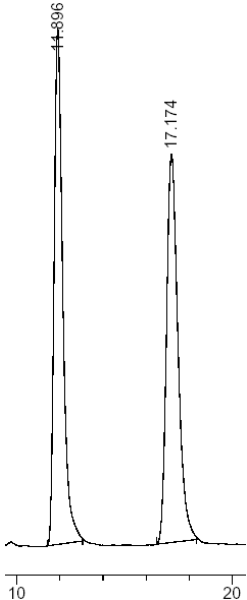 |           |           |  |          |           |
| Peak No.                                                                           | 1         | 2         | Peak No.                                                                            | 1        | 2         |
| Time                                                                               | 11.896    | 17.174    | Time                                                                                | 11.393   | 15.891    |
| Height(mAU)                                                                        | 19.37487  | 14.59871  | Height(mAU)                                                                         | 9.8379   | 189.8791  |
| Area(mAU-s)                                                                        | 539.12671 | 537.62329 | Area(mAU-s)                                                                         | 226.0272 | 8193.6816 |
| Area%                                                                              | 50.0698   | 49.9302   | Area%                                                                               | 2.6845   | 97.3155   |

#### Catalytic Reaction Conditions:

3-methoxybenzaldehyde: 0.50 mmol, [Ti{(*R*)-H<sub>8</sub>-BINOLate}(O-*i*-Pr)<sub>2</sub>]<sub>x</sub>: 0.050 mmol,  
 PhTi(O-*i*-Pr)<sub>3</sub>: 0.60 mmol, rt, THF: 4 mL, 1 min.

#### Spectrum Data:

<sup>1</sup>H NMR (400 MHz, CDCl<sub>3</sub>): δ 7.33-7.18 (m, 6H), 6.91-6.88 (m, 2H), 6.77-6.74 (m, 1H),  
 5.69 (s, 1H), 3.71 (s, 3H), 2.78 (br, 1H) ppm.

<sup>13</sup>C{<sup>1</sup>H} NMR (100 MHz, CDCl<sub>3</sub>): δ 159.6, 145.4, 143.6, 129.4, 128.3, 127.4, 126.4, 118.8, 112.8,  
 112.0, 75.9, 55.0 ppm.

**II.5. (*R*)-(4-Methoxy-phenyl)-phenyl-methanol ((*R*)-9e) (Table 2, entry 5):<sup>6-9</sup>**

|                                                                                   |                 |                                                  |
|-----------------------------------------------------------------------------------|-----------------|--------------------------------------------------|
| 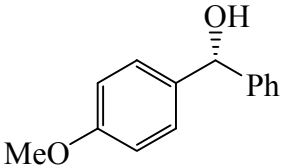 | Column:         | Chiralcel OJ                                     |
|                                                                                   | Eluent:         | Hexane/IPA = 90/10                               |
|                                                                                   | Flow rate:      | 1 mL/min                                         |
|                                                                                   | Detector:       | UV, 254 nm                                       |
|                                                                                   | Retention time: | 28.101 min ( <i>R</i> ), 31.751 min ( <i>S</i> ) |

| Racemic standard                                                                   |            |            | Catalytic Reaction Product                                                          |            |           |
|------------------------------------------------------------------------------------|------------|------------|-------------------------------------------------------------------------------------|------------|-----------|
| 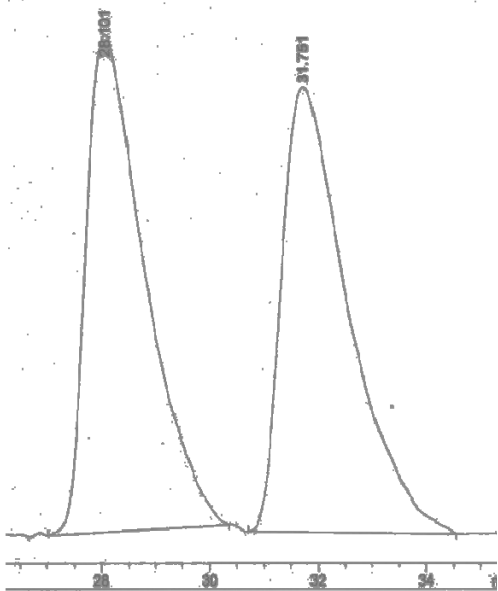 |            |            |  |            |           |
| Peak No.                                                                           | 1          | 2          | Peak No.                                                                            | 1          | 2         |
| Time                                                                               | 28.101     | 31.751     | Time                                                                                | 27.848     | 32.028    |
| Height(mAU)                                                                        | 20.89861   | 18.67842   | Height(mAU)                                                                         | 28.57123   | 1.86357   |
| Area(mAU-s)                                                                        | 1571.78979 | 1584.48865 | Area(mAU-s)                                                                         | 2840.67187 | 149.77913 |
| Area%                                                                              | 49.799     | 50.201     | Area%                                                                               | 94.9914    | 5.0086    |

**Catalytic Reaction Conditions:**

4-methoxybenzaldehyde: 0.50 mmol, [Ti{(*R*)-H<sub>8</sub>-BINOLate}(O-*i*-Pr)<sub>2</sub>]<sub>x</sub>: 0.0150 mmol, PhTi(O-*i*-Pr)<sub>3</sub>: 0.60 mmol, rt, THF: 4 mL, 1 min.

**Spectrum Data:**

<sup>1</sup>H NMR (400 MHz, CDCl<sub>3</sub>): δ 7.36-7.24 (m, 7H), 6.86-6.83 (m, 2H), 5.76 (s, 1H), 3.76 (s, 3H), 2.33 (br, 1H) ppm.

<sup>13</sup>C{<sup>1</sup>H} NMR (400 MHz, CDCl<sub>3</sub>): δ 159.0, 144.0, 136.2, 128.4, 127.9, 127.4, 126.4, 113.8, 75.7, 55.2 ppm.



**II.6. (*R*)-Naphthalen-1-yl-phenyl-methanol ((*R*)-9f) (Table 2, entry 6):<sup>6,7</sup>**

|                                                                                   |                 |                                                  |
|-----------------------------------------------------------------------------------|-----------------|--------------------------------------------------|
| 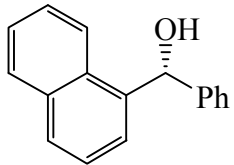 | Column:         | Chiralcel OJ                                     |
|                                                                                   | Eluent:         | Hexane/IPA = 80/20                               |
|                                                                                   | Flow rate:      | 1 mL/min                                         |
|                                                                                   | Detector:       | UV, 254 nm                                       |
|                                                                                   | Retention time: | 12.972 min ( <i>S</i> ), 18.380 min ( <i>R</i> ) |

| Racemic standard                                                                   |                        |                        | Catalytic Reaction Product                                                          |           |                         |
|------------------------------------------------------------------------------------|------------------------|------------------------|-------------------------------------------------------------------------------------|-----------|-------------------------|
| 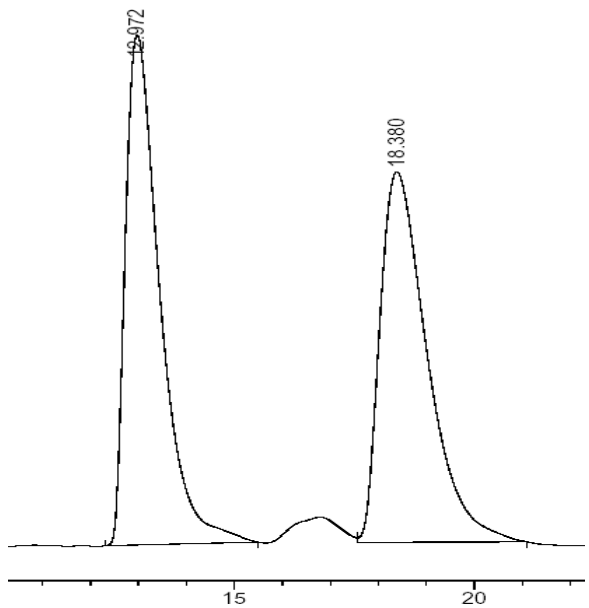 |                        |                        |  |           |                         |
| Peak No.                                                                           | 1                      | 2                      | Peak No.                                                                            | 1         | 2                       |
| Time                                                                               | 12.972                 | 18.380                 | Time                                                                                | 13.401    | 19.214                  |
| Height(mAU)                                                                        | 280.200                | 203.455                | Height(mAU)                                                                         | 6.31342   | 175.13702               |
| Area(mAU-s)                                                                        | 1.40 x 10 <sup>4</sup> | 1.39 x 10 <sup>4</sup> | Area(mAU-s)                                                                         | 363.30765 | 1.36 x 10 <sup>-4</sup> |
| Area%                                                                              | 50.2435                | 49.7565                | Area%                                                                               | 2.5990    | 97.4010                 |

**Catalytic Reaction Conditions:**

1-naphthylaldehyde: 0.50 mmol, [Ti{(*R*)-H<sub>8</sub>-BINOLate}(O-*i*-Pr)<sub>2</sub>]<sub>x</sub>: 0.0250 mmol,  
 PhTi(O-*i*-Pr)<sub>3</sub>: 0.60 mmol, rt, THF: 4 mL, 1 min.

**Spectrum Data:**

<sup>1</sup>H NMR (400 MHz, CDCl<sub>3</sub>): δ 8.04-7.24 (m, 12H), 6.53 (d, *J* = 3.2 Hz, 1H), 2.38 (d, *J* = 3.6 Hz, 1H) ppm.

<sup>13</sup>C{<sup>1</sup>H} NMR (100 MHz, CDCl<sub>3</sub>): δ 143.1, 138.8, 134.0, 130.7, 128.8, 128.52, 128.49, 127.7, 127.0, 126.1, 125.6, 125.3, 124.6, 124.0, 73.7 ppm.

II.7. (*R*)-Naphthalen-2-yl-phenyl-methanol (*R*-9g) (Table 2, entry 7):<sup>6</sup>

|                                                                                   |                 |                                                  |
|-----------------------------------------------------------------------------------|-----------------|--------------------------------------------------|
| 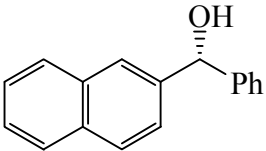 | Column:         | Chiralcel OD                                     |
|                                                                                   | Eluent:         | Hexane/IPA = 95/5                                |
|                                                                                   | Flow rate:      | 1 mL/min                                         |
|                                                                                   | Detector:       | UV, 254 nm                                       |
|                                                                                   | Retention time: | 24.491 min ( <i>S</i> ), 29.915 min ( <i>R</i> ) |

| Racemic standard                                                                   |                        |                        | Catalytic Reaction Product                                                          |          |            |
|------------------------------------------------------------------------------------|------------------------|------------------------|-------------------------------------------------------------------------------------|----------|------------|
| 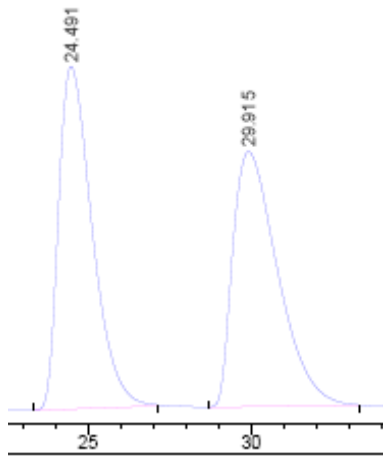 |                        |                        |  |          |            |
| Peak No.                                                                           | 1                      | 2                      | Peak No.                                                                            | 1        | 2          |
| Time                                                                               | 24.491                 | 29.915                 | Time                                                                                | 23.438   | 28.515     |
| Height(mAU)                                                                        | 562.46753              | 419.05048              | Height(mAU)                                                                         | 1.36497  | 20.19909   |
| Area(mAU-s)                                                                        | 4.02 x 10 <sup>4</sup> | 3.99 x 10 <sup>4</sup> | Area(mAU-s)                                                                         | 53.83646 | 1120.45483 |
| Area%                                                                              | 50.1250                | 49.8750                | Area%                                                                               | 4.5846   | 95.4154    |

**Catalytic Reaction Conditions:**

2-naphthylaldehyde: 0.50 mmol, [Ti{(*R*)-H<sub>8</sub>-BINOLate}(O-*i*-Pr)<sub>2</sub>]<sub>x</sub>: 0.0250 mmol,  
 PhTi(O-*i*-Pr)<sub>3</sub>: 0.60 mmol, rt, THF: 4 mL, 1 min.

**Spectrum Data:**

<sup>1</sup>H NMR (400 MHz, CDCl<sub>3</sub>): δ 7.89-7.77 (m, 4H), 7.49-7.24 (m, 8H), 5.99 (d, *J* = 3.2 Hz, 1H), 2.39 (d, *J* = 3.6 Hz, 1H) ppm.

<sup>13</sup>C{<sup>1</sup>H} NMR (100 MHz, CDCl<sub>3</sub>): δ 143.6, 141.1, 133.3, 132.9, 128.5, 128.3, 128.1, 127.7, 126.7, 126.2, 126.0, 125.0, 124.8, 76.4 ppm.

**II.8. (*R*)-(2-Chloro-phenyl)-phenyl-methanol (*R*-9h) (Table 2, entry 8):<sup>6</sup>**

|                                                                                   |                 |                                                  |
|-----------------------------------------------------------------------------------|-----------------|--------------------------------------------------|
| 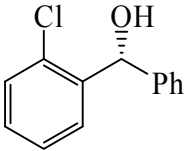 | Column:         | Chiralcel OJ                                     |
|                                                                                   | Eluent:         | Hexane/IPA = 80/20                               |
|                                                                                   | Flow rate:      | 1 mL/min                                         |
|                                                                                   | Detector:       | UV, 254 nm                                       |
|                                                                                   | Retention time: | 10.029 min ( <i>R</i> ), 12.721 min ( <i>S</i> ) |

| Racemic standard                                                                   |            |            | Catalytic Reaction Product                                                          |            |          |
|------------------------------------------------------------------------------------|------------|------------|-------------------------------------------------------------------------------------|------------|----------|
| 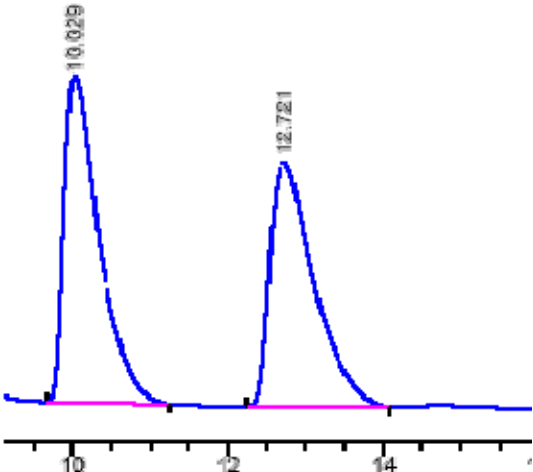 |            |            |  |            |          |
| Peak No.                                                                           | 1          | 2          | Peak No.                                                                            | 1          | 2        |
| Time                                                                               | 10.029     | 12.721     | Time                                                                                | 9.462      | 12.683   |
| Height(mAU)                                                                        | 35.58539   | 26.77971   | Height(mAU)                                                                         | 205.7819   | 5.89407  |
| Area(mAU-s)                                                                        | 1097.77649 | 1059.42090 | Area(mAU-s)                                                                         | 9804.27930 | 254.6468 |
| Area%                                                                              | 50.8890    | 49.1110    | Area%                                                                               | 97.4684    | 2.5316   |

**Catalytic Reaction Conditions:**

2-chlorobenzaldehyde: 0.50 mmol, [Ti{(*R*)-H<sub>8</sub>-BINOLate}(O-*i*-Pr)<sub>2</sub>]<sub>x</sub>: 0.050 mmol,  
 PhTi(O-*i*-Pr)<sub>3</sub>: 0.60 mmol, rt, THF: 4 mL, 1 min.

**Spectrum Data:**

<sup>1</sup>H NMR (400 MHz, CDCl<sub>3</sub>): δ 7.58-7.15 (m, 9H), 6.15 (s, 1H), 2.65 (br, 1H) ppm.

<sup>13</sup>C{<sup>1</sup>H} NMR (100 MHz, CDCl<sub>3</sub>): δ 142.1, 140.9, 132.4, 129.4, 128.6, 128.4, 127.9, 127.7, 127.0, 126.9, 72.5 ppm.

**II.9. (*R*)-(3-Chloro-phenyl)-phenyl-methanol ((*R*)-9i) (Table 2, entry 9):<sup>6</sup>**

|                                                                                   |                 |                                                  |
|-----------------------------------------------------------------------------------|-----------------|--------------------------------------------------|
| 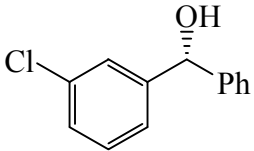 | Column:         | Chiralcel OD-H,                                  |
|                                                                                   | Eluent:         | Hexane/IPA = 98/2                                |
|                                                                                   | Flow rate:      | 1 mL/min                                         |
|                                                                                   | Detector:       | UV, 254 nm                                       |
|                                                                                   | Retention time: | 18.259 min ( <i>R</i> ), 20.105 min ( <i>S</i> ) |

| Racemic standard                                                                   |         |         | Catalytic Reaction Product                                                          |          |           |
|------------------------------------------------------------------------------------|---------|---------|-------------------------------------------------------------------------------------|----------|-----------|
| 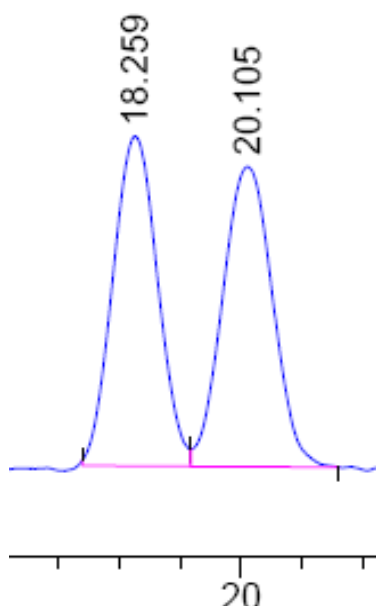 |         |         |  |          |           |
| Peak No.                                                                           | 1       | 2       | Peak No.                                                                            | 1        | 2         |
| Time                                                                               | 18.259  | 20.105  | Time                                                                                | 17.404   | 18.808    |
| Height(mAU)                                                                        | 7.271   | 6.611   | Height(mAU)                                                                         | 3.6232   | 72.3607   |
| Area(mAU-s)                                                                        | 370.991 | 376.603 | Area(mAU-s)                                                                         | 130.0882 | 3964.7949 |
| Area%                                                                              | 49.625  | 50.375  | Area%                                                                               | 3.1768   | 96.8232   |

**Catalytic Reaction Conditions:**

3-chlorobenzaldehyde: 0.50 mmol, [Ti{(*R*)-H<sub>8</sub>-BINOLate}(O-*i*-Pr)<sub>2</sub>]<sub>x</sub>: 0.050 mmol,  
 PhTi(O-*i*-Pr)<sub>3</sub>: 0.60 mmol, rt, THF: 4 mL, 1 min.

**Spectrum Data:**

<sup>1</sup>H NMR (400 MHz, CDCl<sub>3</sub>): 7.35-7.20 (m, 9H), 5.68 (s, 1H), 2.63 (br, 1H) ppm.

<sup>13</sup>C{<sup>1</sup>H} NMR (100 MHz, CDCl<sub>3</sub>): 145.7, 143.1, 134.3, 129.6, 128.6, 127.8, 127.5, 126.5,  
 124.5, 75.5 ppm

**II.10. (*R*)-(4-Chloro-phenyl)-phenyl-methanol ((*R*)-9j) (Table 2, entry 10):<sup>6-8</sup>**

|                                                                                   |                 |                                                 |
|-----------------------------------------------------------------------------------|-----------------|-------------------------------------------------|
| 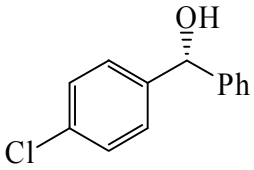 | Column:         | Chiralcel OB-H,                                 |
|                                                                                   | Eluent:         | Hexane/IPA = 92/8                               |
|                                                                                   | Flow rate:      | 1 mL/min                                        |
|                                                                                   | Detector:       | UV, 254 nm                                      |
|                                                                                   | Retention time: | 10.185 min ( <i>R</i> ), 15.515min ( <i>S</i> ) |

| Racemic standard                                                                   |            |            | Catalytic Reaction Product                                                          |           |           |
|------------------------------------------------------------------------------------|------------|------------|-------------------------------------------------------------------------------------|-----------|-----------|
| 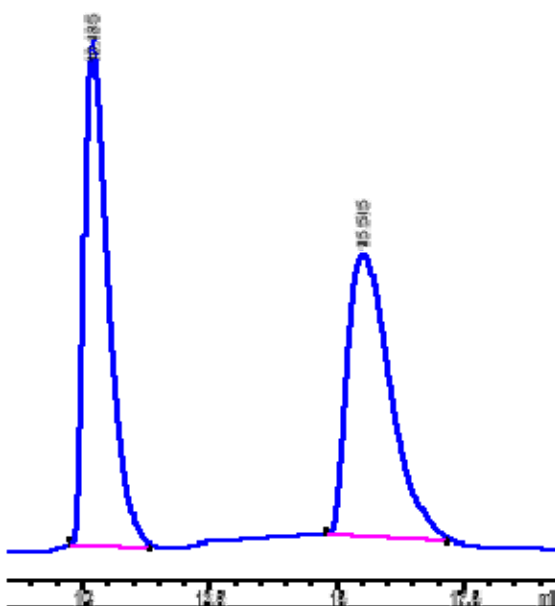 |            |            |  |           |           |
| Peak No.                                                                           | 1          | 2          | Peak No.                                                                            | 1         | 2         |
| Time                                                                               | 10.185     | 15.515     | Time                                                                                | 10.021    | 16.203    |
| Height(mAU)                                                                        | 170.29872  | 95.49712   | Height(mAU)                                                                         | 233.51138 | 3.06891   |
| Area(mAU-s)                                                                        | 5576.95654 | 5582.49712 | Area(mAU-s)                                                                         | 1.33502e4 | 167.38177 |
| Area%                                                                              | 49.9759    | 50.0241    | Area%                                                                               | 98.7618   | 1.2382    |

**Catalytic Reaction Conditions:**

4-chlorobenzaldehyde: 0.50 mmol, [Ti{(*R*)-H<sub>8</sub>-BINOLate}(O-*i*-Pr)<sub>2</sub>]<sub>x</sub>: 0.050 mmol,  
 PhTi(O-*i*-Pr)<sub>3</sub>: 0.60 mmol, rt, THF: 4 mL, 1 min.

**Spectrum Data:**

<sup>1</sup>H NMR (400 MHz, CDCl<sub>3</sub>): 7.35-7.25 (m, 9H), 5.80 (s, 1H), 2.31 (br, 1H) ppm.

<sup>13</sup>C{<sup>1</sup>H} NMR (100 MHz, CDCl<sub>3</sub>): 143.4, 142.2, 133.3, 128.6, 128.6, 127.9, 127.8, 126.5,  
 75.6 ppm.

**II.11. (*R*)-Phenyl-(4-trifluoromethylphenyl)-methanol ((*R*)-9k) (Table 2, entry 11):<sup>6</sup>**

|                                                                                   |                 |                                                 |
|-----------------------------------------------------------------------------------|-----------------|-------------------------------------------------|
| 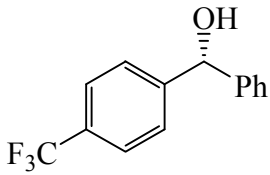 | Column:         | Chiralcel OB-H                                  |
|                                                                                   | Eluent:         | Hexane/IPA = 94/6                               |
|                                                                                   | Flow rate:      | 1 mL/min                                        |
|                                                                                   | Detector:       | UV, 254 nm                                      |
|                                                                                   | Retention time: | 6.811 min ( <i>R</i> ), 10.728 min ( <i>S</i> ) |

| Racemic standard                                                                   |         |         | Catalytic Reaction Product                                                          |            |           |
|------------------------------------------------------------------------------------|---------|---------|-------------------------------------------------------------------------------------|------------|-----------|
| 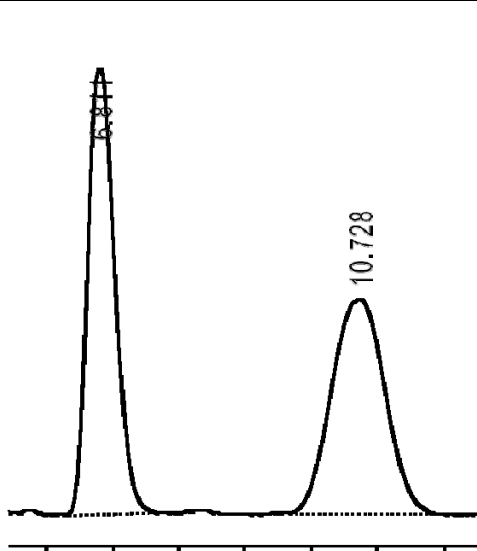 |         |         |  |            |           |
| Peak No.                                                                           | 1       | 2       | Peak No.                                                                            | 1          | 2         |
| Time                                                                               | 6.811   | 10.728  | Time                                                                                | 6.386      | 9.635     |
| Height(mAU)                                                                        | 367614  | 177379  | Height(mAU)                                                                         | 257.82782  | 3.07813   |
| Area(mAU-s)                                                                        | 9539451 | 9568137 | Area(mAU-s)                                                                         | 6686.23877 | 115.37144 |
| Area%                                                                              | 49.924  | 50.075  | Area%                                                                               | 98.3038    | 1.6962    |

**Catalytic Reaction Conditions:**

4-trifluoromethylbenzaldehyde: 0.50 mmol, [Ti{(*R*)-H<sub>8</sub>-BINOLate}(O-*i*-Pr)<sub>2</sub>]<sub>x</sub>: 0.050 mmol, PhTi(O-*i*-Pr)<sub>3</sub>: 0.60 mmol, rt, THF: 4 mL, 1 min.

**Spectrum Data:**

<sup>1</sup>H NMR (400 MHz, CDCl<sub>3</sub>): δ 7.60-7.25 (m, 9H), 5.88 (s, 1H), 2.36 (br, 1H) ppm.

<sup>13</sup>C{<sup>1</sup>H} NMR (100 MHz, CDCl<sub>3</sub>): δ 147.5, 143.2, 129.6 (q, *J* = 31.8 Hz), 128.7, 128.0, 126.61, 126.57, 125.3 (q, *J* = 3.6 Hz), 124.1 (q, *J* = 270 Hz), 75.6 ppm.

**II.12. (*S*)-(*E*)-1,3-Diphenyl-prop-2-en-1-ol ((*S*)-9l) (Table 2, entry 12):<sup>6</sup>**

|                                                                                   |                 |                                                  |
|-----------------------------------------------------------------------------------|-----------------|--------------------------------------------------|
| 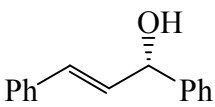 | Column:         | Chiralcel OD                                     |
|                                                                                   | Eluent:         | Hexane/IPA = 88/12                               |
|                                                                                   | Flow rate:      | 1 mL/min                                         |
|                                                                                   | Detector:       | UV, 254 nm                                       |
|                                                                                   | Retention time: | 11.458 min ( <i>S</i> ), 14.539 min ( <i>R</i> ) |

| Racemic standard                                                                   |                      |                      | Catalytic Reaction Product                                                          |           |            |
|------------------------------------------------------------------------------------|----------------------|----------------------|-------------------------------------------------------------------------------------|-----------|------------|
| 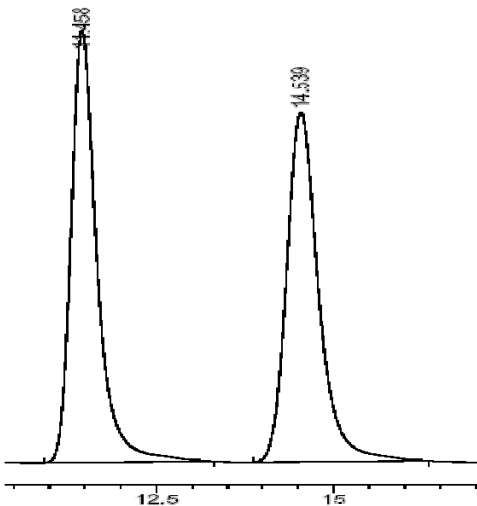 |                      |                      |  |           |            |
| Peak No.                                                                           | 1                    | 2                    | Peak No.                                                                            | 1         | 2          |
| Time                                                                               | 11.458               | 14.539               | Time                                                                                | 11.737    | 14.884     |
| Height(mAU)                                                                        | 788.50482            | 637.28748            | Height(mAU)                                                                         | 2579.0183 | 125.96530  |
| Area(mAU-s)                                                                        | $2.0002 \times 10^4$ | $1.9941 \times 10^4$ | Area(mAU-s)                                                                         | 6.23416e4 | 3384.52441 |
| Area%                                                                              | 50.076               | 49.924               | Area%                                                                               | 94.8506   | 5.1494     |

**Catalytic Reaction Conditions:**

cinnamaldehyde: 0.50 mmol, [Ti{(*R*)-H<sub>8</sub>-BINOLate}(O-*i*-Pr)<sub>2</sub>]<sub>x</sub>: 0.050 mmol,  
 PhTi(O-*i*-Pr)<sub>3</sub>: 0.60 mmol, rt, THF: 4 mL, 1 min.

**Spectrum Data:**

<sup>1</sup>H NMR (400 MHz, CDCl<sub>3</sub>): δ 7.45-7.22 (m, 10H), 6.69 (d, *J* = 16.0 Hz, 1H), 6.71-6.36 (m, 1H), 5.39 (dd, *J* = 3.2, 6.8 Hz, 1H), 2.07 (d, *J* = 3.6 Hz, 1H) ppm.

<sup>13</sup>C{<sup>1</sup>H} NMR (100 MHz, CDCl<sub>3</sub>): δ 142.7, 136.5, 131.5, 130.5, 128.6, 128.5, 127.7, 126.6, 126.3, 75.0 ppm

**II.13. (*R*)-(Furan-2-yl)-phenyl-methanol ((*R*)-9m) (Table 2, entry 13):<sup>6</sup>**

|                                                                                   |                 |                                                  |
|-----------------------------------------------------------------------------------|-----------------|--------------------------------------------------|
| 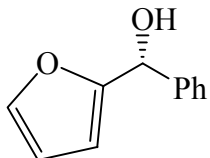 | Column:         | Chiralcel OD                                     |
|                                                                                   | Eluent:         | Hexane/IPA = 95/5                                |
|                                                                                   | Flow rate:      | 1 mL/min                                         |
|                                                                                   | Detector:       | UV, 254 nm                                       |
|                                                                                   | Retention time: | 12.913 min ( <i>S</i> ), 15.620 min ( <i>R</i> ) |

| Racemic standard                                                                   |           |           | Catalytic Reaction Product                                                          |           |            |
|------------------------------------------------------------------------------------|-----------|-----------|-------------------------------------------------------------------------------------|-----------|------------|
| 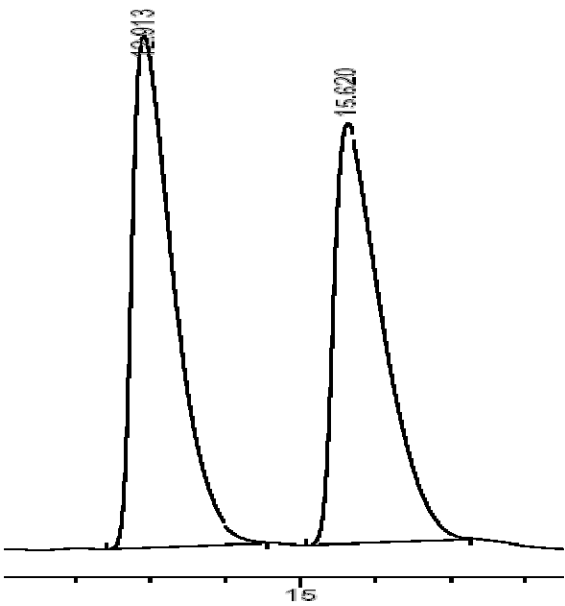 |           |           |  |           |            |
| Peak No.                                                                           | 1         | 2         | Peak No.                                                                            | 1         | 2          |
| Time                                                                               | 12.913    | 15.620    | Time                                                                                | 12.188    | 14.151     |
| Height(mAU)                                                                        | 178.42395 | 146.73128 | Height(mAU)                                                                         | 9.63425   | 200.87593  |
| Area(mAU-s)                                                                        | 6797.8076 | 6656.7915 | Area(mAU-s)                                                                         | 242.05536 | 6700.58301 |
| Area%                                                                              | 50.5240   | 49.4760   | Area%                                                                               | 3.4865    | 96.5135    |

**Catalytic Reaction Conditions:**

2-furylaldehyde: 0.50 mmol, [Ti{(*R*)-H<sub>8</sub>-BINOLate}(O-*i*-Pr)<sub>2</sub>]<sub>x</sub>: 0.050 mmol,  
 PhTi(O-*i*-Pr)<sub>3</sub>: 0.60 mmol, rt, THF: 4 mL, 1 min.

**Spectrum Data:**

<sup>1</sup>H NMR (400 MHz, CDCl<sub>3</sub>): δ 7.44-7.28 (m, 6H), 6.31 (dd, *J* = 3.2, 1.6 Hz, 1H), 6.10 (dd, *J* = 4.0, 0.8 Hz, 1H), 5.80 (d, *J* = 2.4 Hz, 1H), 2.56 (br, 1H) ppm.

<sup>13</sup>C{<sup>1</sup>H} NMR (100 MHz, CDCl<sub>3</sub>): δ 156.0, 142.5, 140.8, 128.4, 128.0, 126.6, 110.2, 107.4, 70.1 ppm.



**II.14. (S)-1-Phenyl-pentan-1-ol ((S)-9n) (Table 2, entry 14):<sup>6</sup>**

|                                                                                   |                 |                                                  |
|-----------------------------------------------------------------------------------|-----------------|--------------------------------------------------|
| 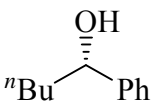 | Column:         | Chiralcel OD                                     |
|                                                                                   | Eluent:         | Hexane/IPA = 99.5/0.5                            |
|                                                                                   | Flow rate:      | 1 mL/min                                         |
|                                                                                   | Detector:       | UV, 254 nm                                       |
|                                                                                   | Retention time: | 26.121 min ( <i>R</i> ), 32.354 min ( <i>S</i> ) |

| Racemic standard                                                                   |            |           | Catalytic Reaction Product                                                          |           |            |
|------------------------------------------------------------------------------------|------------|-----------|-------------------------------------------------------------------------------------|-----------|------------|
| 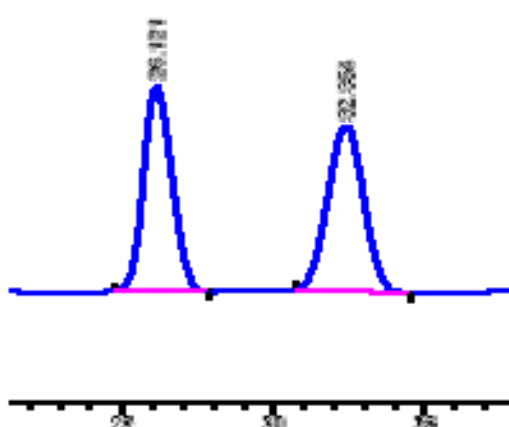 |            |           |  |           |            |
| Peak No.                                                                           | 1          | 2         | Peak No.                                                                            | 1         | 2          |
| Time                                                                               | 26.121     | 32.354    | Time                                                                                | 27.066    | 31.183     |
| Height(mAU)                                                                        | 17.76250   | 14.28900  | Height(mAU)                                                                         | 2.26377   | 35.53828   |
| Area(mAU-s)                                                                        | 1146.18652 | 1178.7867 | Area(mAU-s)                                                                         | 116.88503 | 2634.56323 |
| Area%                                                                              | 49.2989    | 50.7011   | Area%                                                                               | 4.2481    | 95.7519    |

**Catalytic Reaction Conditions:**

pentanal: 0.50 mmol, [Ti{(R)-H<sub>8</sub>-BINOLate}(O-*i*-Pr)<sub>2</sub>]<sub>x</sub>: 0.050 mmol,  
 PhTi(O-*i*-Pr)<sub>3</sub>: 0.60 mmol, rt, THF: 4 mL, 1 min.

**Spectrum Data:**

<sup>1</sup>H NMR (400 MHz, CDCl<sub>3</sub>): δ 7.35-7.24 (m, 5H), 4.64-4.61 (m, 1H), 2.02 (br, 1H),  
 1.81-1.67 (m, 2H), 1.40-1.21 (m, 4H), 0.89-0.85 (m, 3H) ppm.

<sup>13</sup>C{<sup>1</sup>H} NMR (100 MHz, CDCl<sub>3</sub>): δ 144.9, 128.4, 127.4, 125.5, 74.6, 38.8, 27.9, 22.5, 13.9  
 ppm.

**II.15. (S)-2-methyl-1-phenyl-propan-1-ol ((S)-9o) (Table 2, entry 15):<sup>6</sup>**

|                                                                                   |                 |                                                |
|-----------------------------------------------------------------------------------|-----------------|------------------------------------------------|
| 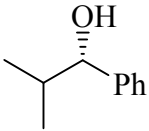 | Column:         | Chiralcel OD-H                                 |
|                                                                                   | Eluent:         | Hexane/IPA = 98/2                              |
|                                                                                   | Flow rate:      | 1 mL/min                                       |
|                                                                                   | Detector:       | UV, 254 nm                                     |
|                                                                                   | Retention time: | 5.766 min ( <i>S</i> ), 6.301 min ( <i>R</i> ) |

| Racemic standard                                                                   |           |            | Catalytic Reaction Product                                                          |           |          |
|------------------------------------------------------------------------------------|-----------|------------|-------------------------------------------------------------------------------------|-----------|----------|
| 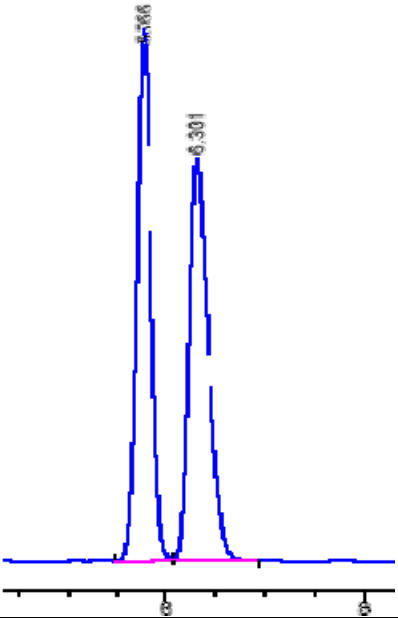 |           |            |  |           |          |
| Peak No.                                                                           | 1         | 2          | Peak No.                                                                            | 1         | 2        |
| Time                                                                               | 5.766     | 6.301      | Time                                                                                | 5.754     | 6.374    |
| Height(mAU)                                                                        | 153.62849 | 116.72093  | Height(mAU)                                                                         | 161.34369 | 4.32873  |
| Area(mAU-s)                                                                        | 1603.4288 | 1609.57263 | Area(mAU-s)                                                                         | 1665.5638 | 45.42761 |
| Area%                                                                              | 49.9044   | 50.0956    | Area%                                                                               | 97.3450   | 2.6550   |

**Catalytic Reaction Conditions:**

isobutyraldehyde: 0.50 mmol, [Ti{(R)-H<sub>8</sub>-BINOLate}(O-*i*-Pr)<sub>2</sub>]<sub>x</sub>: 0.050 mmol,  
 PhTi(O-*i*-Pr)<sub>3</sub>: 0.60 mmol, rt, THF: 4 mL, 1 min.

**Spectrum Data:**

<sup>1</sup>H NMR (400 MHz, CDCl<sub>3</sub>): δ 7.35-7.24 (m, 5H), 4.34 (m, 1H), 1.99-1.91 (m, 1H), 0.99 (d, *J* = 6.4 Hz, 3H), 0.78 (d, *J* = 6.8 Hz, 3H) ppm.

<sup>13</sup>C{<sup>1</sup>H} NMR (100 MHz, CDCl<sub>3</sub>): δ 143.6, 128.1, 127.3, 126.5, 80.0, 35.2, 19.0, 18.2 ppm.

**II.16. (*S*)-2,2-Dimethyl-1-phenyl-propan-1-ol ((*S*)-9p) (Table 2, entry 16):<sup>6</sup>**

|                                                                                   |                 |                                                 |
|-----------------------------------------------------------------------------------|-----------------|-------------------------------------------------|
| 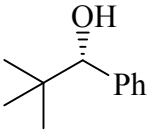 | Column:         | Chiralcel OD                                    |
|                                                                                   | Eluent:         | Hexane/IPA = 99/1                               |
|                                                                                   | Flow rate:      | 1 mL/min                                        |
|                                                                                   | Detector:       | UV, 254 nm                                      |
|                                                                                   | Retention time: | 8.522 min ( <i>S</i> ), 12.048 min ( <i>R</i> ) |

| Racemic standard                                                                   |            |            | Catalytic Reaction Product                                                          |           |          |
|------------------------------------------------------------------------------------|------------|------------|-------------------------------------------------------------------------------------|-----------|----------|
| 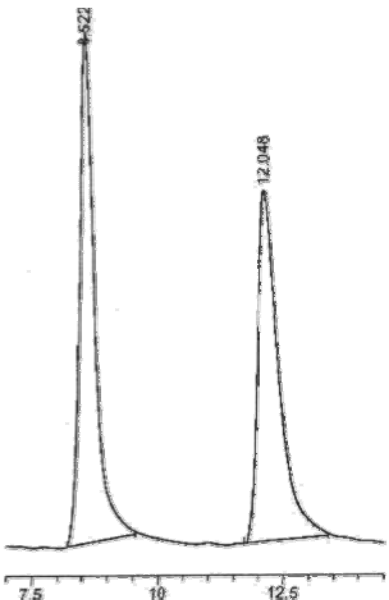 |            |            |  |           |          |
| Peak No.                                                                           | 1          | 2          | Peak No.                                                                            | 1         | 2        |
| Time                                                                               | 8.522      | 12.048     | Time                                                                                | 8.589     | 12.026   |
| Height(mAU)                                                                        | 59.37840   | 40.73387   | Height(mAU)                                                                         | 1121.4054 | 38.51155 |
| Area(mAU-s)                                                                        | 1219.93262 | 1208.75183 | Area(mAU-s)                                                                         | 60.99925  | 2.08175  |
| Area%                                                                              | 50.2302    | 49.7698    | Area%                                                                               | 96.6798   | 3.3202   |

**Catalytic Reaction Conditions:**

pivalaldehyde: 0.50 mmol, [Ti{(*R*)-H<sub>8</sub>-BINOLate}(O-*i*-Pr)<sub>2</sub>]<sub>x</sub>: 0.050 mmol,  
 PhTi(O-*i*-Pr)<sub>3</sub>: 0.60 mmol, rt, THF: 4 mL, 1 min.

**Spectrum Data:**

<sup>1</sup>H NMR (400 MHz, CDCl<sub>3</sub>): δ 7.23-7.18 (m, 5H), 4.30 (d, *J* = 2.8 Hz, 1H), 1.87 (d, *J* = 2.8 Hz, 1H), 0.90 (s, 9H) ppm.

<sup>13</sup>C{<sup>1</sup>H} NMR (100 MHz, CDCl<sub>3</sub>): δ 142.2, 127.6, 127.5, 127.2, 82.4, 35.6, 25.9 ppm.

**II.17. (*S*)-(4-Methyl-phenyl)-phenyl-methanol ((*S*)-9b) (Table 2, entry 17):<sup>6,7</sup>**

|                                                                                   |                 |                                                 |
|-----------------------------------------------------------------------------------|-----------------|-------------------------------------------------|
| 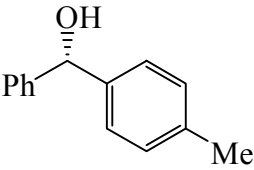 | Column:         | Chiralcel OB-H                                  |
|                                                                                   | Eluent:         | Hexane/IPA = 95/5                               |
|                                                                                   | Flow rate:      | 1 mL/min                                        |
|                                                                                   | Detector:       | UV, 254 nm                                      |
|                                                                                   | Retention time: | 8.738 min ( <i>R</i> ), 10.921 min ( <i>S</i> ) |

| Racemic standard                                                                   |            |            | Catalytic Reaction Product                                                          |           |           |
|------------------------------------------------------------------------------------|------------|------------|-------------------------------------------------------------------------------------|-----------|-----------|
|  |            |            |  |           |           |
| Peak No.                                                                           | 1          | 2          | Peak No.                                                                            | 1         | 2         |
| Time                                                                               | 8.738      | 10.921     | Time                                                                                | 9.352     | 10.717    |
| Height(mAU)                                                                        | 201.78398  | 153.31110  | Height(mAU)                                                                         | 9.01436   | 237.03903 |
| Area(mAU-s)                                                                        | 8576.84473 | 8444.35059 | Area(mAU-s)                                                                         | 369.15567 | 1.53842e4 |
| Area%                                                                              | 50.3892    | 49.6108    | Area%                                                                               | 2.3433    | 97.6567   |

**Catalytic Reaction Conditions:**

benzaldehyde: 0.50 mmol, [Ti{(*R*)-H<sub>8</sub>-BINOLate}(O-*i*-Pr)<sub>2</sub>]<sub>x</sub>: 0.050 mmol,  
 (4-MeC<sub>6</sub>H<sub>4</sub>)Ti(O-*i*-Pr)<sub>3</sub>: 0.60 mmol, rt, THF: 4 mL, 1 min.

**Spectrum Data:**

<sup>1</sup>H NMR (400 MHz, CDCl<sub>3</sub>): δ 7.36-7.12 (m, 9H), 5.77 (d, 1H), 2.32 (s, 3H), 2.27 (br, 1H) ppm.

<sup>13</sup>C{<sup>1</sup>H} NMR (100 MHz, CDCl<sub>3</sub>): δ 144.0, 141.0, 137.2, 129.2, 128.4, 127.4, 126.5, 126.5, 76.1, 21.1 ppm.

**II.18. (S)-(4-Methoxy-phenyl)-phenyl-methanol ((S)-9e) (Table 2, entry 18):<sup>6,7</sup>**

|                                                                                   |                 |                                                  |
|-----------------------------------------------------------------------------------|-----------------|--------------------------------------------------|
| 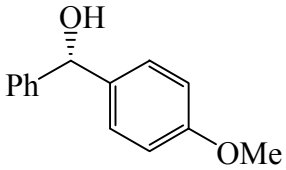 | Column:         | Chiralcel OJ                                     |
|                                                                                   | Eluent:         | Hexane/IPA = 90/10                               |
|                                                                                   | Flow rate:      | 1 mL/min                                         |
|                                                                                   | Detector:       | UV, 254 nm                                       |
|                                                                                   | Retention time: | 27.815 min ( <i>R</i> ), 31.756 min ( <i>S</i> ) |

| Racemic standard                                                                   |           |            | Catalytic Reaction Product                                                          |           |           |
|------------------------------------------------------------------------------------|-----------|------------|-------------------------------------------------------------------------------------|-----------|-----------|
| 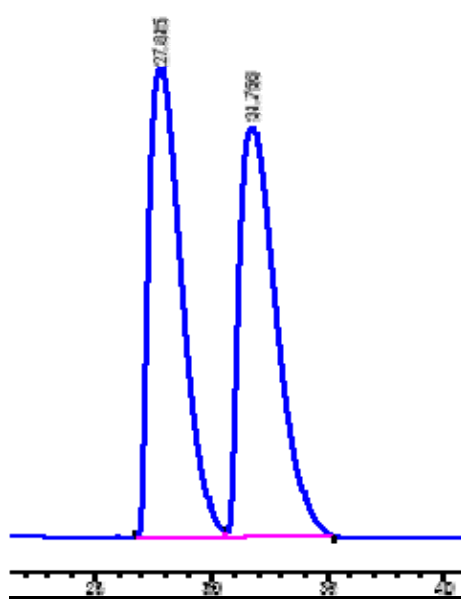 |           |            |  |           |           |
| Peak No.                                                                           | 1         | 2          | Peak No.                                                                            | 1         | 2         |
| Time                                                                               | 27.815    | 31.756     | Time                                                                                | 28.837    | 31.359    |
| Height(mAU)                                                                        | 62.56820  | 54.77216   | Height(mAU)                                                                         | 6.13610   | 116.24293 |
| Area(mAU-s)                                                                        | 6033.6665 | 6032.40625 | Area(mAU-s)                                                                         | 386.10165 | 155928e4  |
| Area%                                                                              | 50.0052   | 49.9948    | Area%                                                                               | 2.4163    | 97.5837   |

**Catalytic Reaction Conditions:**

benzaldehyde: 0.50 mmol, [Ti{(R)-H<sub>8</sub>-BINOLate}(O-*i*-Pr)<sub>2</sub>]<sub>x</sub>: 0.050 mmol,  
 (4-MeOC<sub>6</sub>H<sub>4</sub>)Ti(O-*i*-Pr)<sub>3</sub>: 0.60 mmol, rt, THF: 4 mL, 1 min.

**Spectrum Data:**

<sup>1</sup>H NMR (400 MHz, CDCl<sub>3</sub>): δ 7.36-7.24 (m, 7H), 6.86-6.83 (m, 2H), 5.76 (s, 1H), 3.76 (s, 3H), 2.33 (br, 1H) ppm.

<sup>13</sup>C{<sup>1</sup>H} NMR (100 MHz, CDCl<sub>3</sub>): δ 159.0, 144.0, 136.2, 128.4, 127.9, 127.4, 126.4, 113.8, 75.7, 55.2 ppm.

## II.19. (*S*)-(Naphthalen-2-yl)-phenyl-methanol ((*S*)-9g) (Table 2, entry 19):<sup>6</sup>

|                                                                                   |                                                                                                                                                                      |
|-----------------------------------------------------------------------------------|----------------------------------------------------------------------------------------------------------------------------------------------------------------------|
| 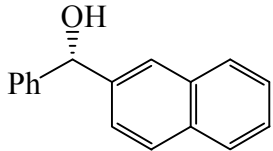 | Column: Chiralcel OD<br>Eluent: Hexane/IPA = 95/5<br>Flow rate: 1 mL/min<br>Detector: UV, 254 nm<br>Retention time: 21.816 min ( <i>S</i> ), 25.992 min ( <i>R</i> ) |
|-----------------------------------------------------------------------------------|----------------------------------------------------------------------------------------------------------------------------------------------------------------------|

| Racemic standard                                                                   |           |           | Catalytic Reaction Product                                                          |           |            |
|------------------------------------------------------------------------------------|-----------|-----------|-------------------------------------------------------------------------------------|-----------|------------|
| 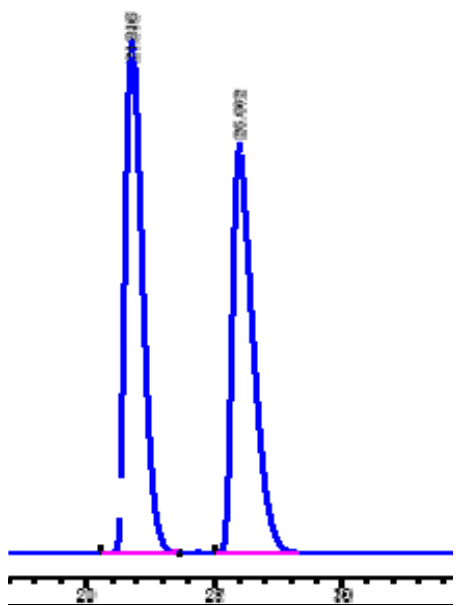 |           |           |  |           |            |
| Peak No.                                                                           | 1         | 2         | Peak No.                                                                            | 1         | 2          |
| Time                                                                               | 21.816    | 25.992    | Time                                                                                | 21.183    | 25.993     |
| Height(mAU))                                                                       | 619.91327 | 494.12964 | Height(mAU)                                                                         | 1446.8031 | 70.42558   |
| Area(mAU-s)                                                                        | 2.84732e4 | 2.85523e4 | Area(mAU-s)                                                                         | 7.17725e4 | 3742.83813 |
| Area%                                                                              | 49.9306   | 50.0694   | Area%                                                                               | 95.0436   | 4.9564     |

### Catalytic Reaction Conditions:

benzaldehyde: 0.50 mmol, [Ti{(*R*)-H<sub>8</sub>-BINOLate}(O-*i*-Pr)<sub>2</sub>]<sub>x</sub>: 0.050 mmol,  
(2-naphthyl)Ti(O-*i*-Pr)<sub>3</sub>: 0.60 mmol, rt, THF: 4 mL, 1 min.

### Spectrum Data:

<sup>1</sup>H NMR (400 MHz, CDCl<sub>3</sub>): δ 7.89-7.77 (m, 4H), 7.49-7.24 (m, 8H), 5.99 (d, *J* = 3.2 Hz, 1H), 2.39 (d, *J* = 3.6 Hz, 1H) ppm.

<sup>13</sup>C{<sup>1</sup>H} NMR (100 MHz, CDCl<sub>3</sub>): δ 143.6, 141.1, 133.3, 132.9, 128.5, 128.3, 128.1, 127.7, 126.7, 126.2, 126.0, 125.0, 124.8, 76.4 ppm.

**II.20. (*S*)-(4-Chloro-phenyl)-phenyl-methanol ((*S*)-91) (Table 2, entry 20):<sup>6,7</sup>**

|                                                                                   |                 |                                                  |
|-----------------------------------------------------------------------------------|-----------------|--------------------------------------------------|
| 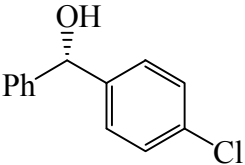 | Column:         | Chiralcel OB-H,                                  |
|                                                                                   | Eluent:         | Hexane/IPA = 92/8                                |
|                                                                                   | Flow rate:      | 1 mL/min                                         |
|                                                                                   | Detector:       | UV, 254 nm                                       |
|                                                                                   | Retention time: | 10.185 min ( <i>R</i> ), 15.515 min ( <i>S</i> ) |

| Racemic standard                                                                   |            |           | Catalytic Reaction Product                                                          |           |           |
|------------------------------------------------------------------------------------|------------|-----------|-------------------------------------------------------------------------------------|-----------|-----------|
| 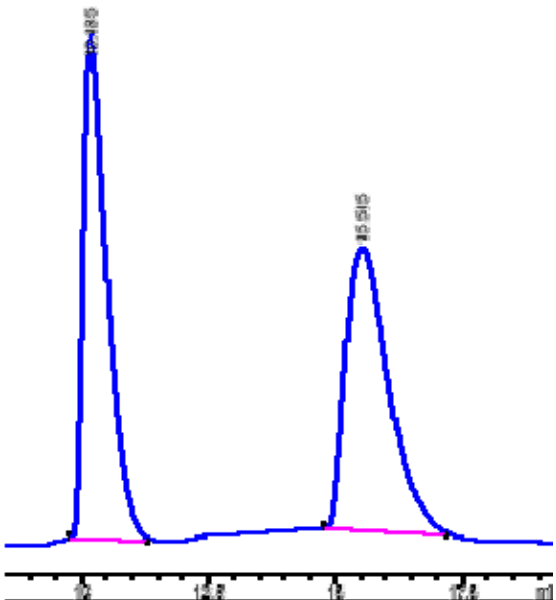 |            |           |  |           |           |
| Peak No.                                                                           | 1          | 2         | Peak No.                                                                            | 1         | 2         |
| Time                                                                               | 10.185     | 15.515    | Time                                                                                | 10.538    | 15.235    |
| Height(mAU)                                                                        | 170.29872  | 95.49712  | Height(mAU)                                                                         | 20.74713  | 159.25754 |
| Area(mAU-s)                                                                        | 5576.95654 | 5582.4971 | Area(mAU-s)                                                                         | 607.11108 | 1.17942e4 |
| Area%                                                                              | 49.9759    | 50.0241   | Area%                                                                               | 4.8955    | 95.1045   |

**Catalytic Reaction Conditions:**

benzaldehyde: 0.50 mmol, [Ti{(*R*)-H<sub>8</sub>-BINOLate}(O-*i*-Pr)<sub>2</sub>]<sub>x</sub>: 0.050 mmol,  
 (4-ClC<sub>6</sub>H<sub>4</sub>)Ti(O-*i*-Pr)<sub>3</sub>: 0.60 mmol, rt, THF: 4 mL, 1 min.

**Spectrum Data:**

<sup>1</sup>H NMR (400 MHz, CDCl<sub>3</sub>): δ 7.35-7.25 (m, 9H), 5.80 (s, 1H), 2.31 (br, 1H) ppm.

<sup>13</sup>C{<sup>1</sup>H} NMR (100 MHz, CDCl<sub>3</sub>): δ 143.4, 142.2, 133.3, 128.6, 128.6, 127.9, 127.8, 126.5, 75.6 ppm.

**II.21. (*S*)-(4-bromo-phenyl)-phenyl-methanol ((*S*)-9q) (Table 2, entry 21):<sup>7</sup>**

|                                                                                   |                 |                                                 |
|-----------------------------------------------------------------------------------|-----------------|-------------------------------------------------|
| 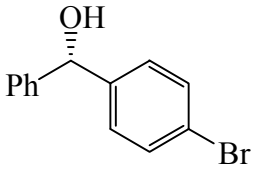 | Column:         | Chiralcel, OB-H                                 |
|                                                                                   | Eluent:         | Hexane/IPA = 90/10                              |
|                                                                                   | Flow rate:      | 1 mL/min                                        |
|                                                                                   | Detector:       | UV, 254 nm                                      |
|                                                                                   | Retention time: | 8.322 min ( <i>R</i> ), 11.477 min ( <i>S</i> ) |

| Racemic standard                                                                   |           |           | Catalytic Reaction Product                                                          |          |            |
|------------------------------------------------------------------------------------|-----------|-----------|-------------------------------------------------------------------------------------|----------|------------|
| 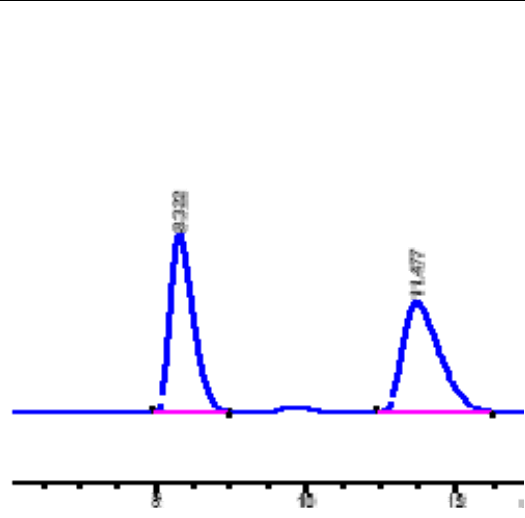 |           |           |  |          |            |
| Peak No.                                                                           | 1         | 2         | Peak No.                                                                            | 1        | 2          |
| Time                                                                               | 8.322     | 11.477    | Time                                                                                | 8.493    | 11.192     |
| Height(mAU)                                                                        | 24.99641  | 15.57013  | Height(mAU)                                                                         | 2.45572  | 43.86544   |
| Area(mAU-s)                                                                        | 519.15289 | 523.18439 | Area(mAU-s)                                                                         | 53.44579 | 1605.62781 |
| Area%                                                                              | 49.8066   | 50.1934   | Area%                                                                               | 3.2214   | 96.7786    |

**Catalytic Reaction Conditions:**

benzaldehyde: 0.50 mmol, [Ti{(*R*)-H<sub>8</sub>-BINOLate}(O-*i*-Pr)<sub>2</sub>]<sub>x</sub>: 0.050 mmol,  
 (4-TMSC<sub>6</sub>H<sub>4</sub>)Ti(O-*i*-Pr)<sub>3</sub>: 0.60 mmol, rt, THF: 4 mL, 1 min.

**Spectrum Data:**

<sup>1</sup>H NMR (400 MHz, CDCl<sub>3</sub>): δ 7.44-7.21 (m, 9H), 5.74 (s, 1H), 2.40 (br, 1H) ppm.

<sup>13</sup>C{<sup>1</sup>H} NMR (100 MHz, CDCl<sub>3</sub>): δ 142.7, 131.5, 128.6, 128.5, 128.2, 127.8, 126.5, 121.4, 75.6 ppm.



### III. Linear Effect Study of $\text{PhTi}(\text{O-}i\text{-Pr})_3$ Additions to 2-Naphthylaldehyde Catalyzed by *rac*- $\text{H}_8\text{-BINOL}$ or *x* mol% (*R*)- $\text{H}_8\text{-BINOL}$

#### III.1. HPLC Conditions and Chromatograms of Linear Effect Study

|                                                                                   |                 |                                                 |
|-----------------------------------------------------------------------------------|-----------------|-------------------------------------------------|
| 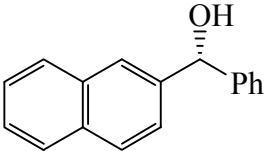 | Column:         | Chiralcel OD                                    |
|                                                                                   | Eluent:         | Hexane/IPA = 95/5                               |
|                                                                                   | Flow rate:      | 1 mL/min                                        |
|                                                                                   | Detector:       | UV, 254 nm                                      |
|                                                                                   | Retention time: | 24.400 min ( <i>S</i> ), 29.18 min ( <i>R</i> ) |

| Racemic $\text{H}_8\text{-BINOL}$                                                   |         |         | 20% ee ( <i>R</i> )- $\text{H}_8\text{-BINOL}$                                       |         |         |
|-------------------------------------------------------------------------------------|---------|---------|--------------------------------------------------------------------------------------|---------|---------|
| 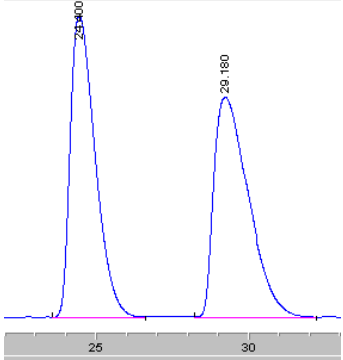  |         |         |   |         |         |
| Peak No.                                                                            | 1       | 2       | Peak No.                                                                             | 1       | 2       |
| Time                                                                                | 24.400  | 29.180  | Time                                                                                 | 23.813  | 28.574  |
| Height(mAU)                                                                         | 722.1   | 527.2   | Height(mAU)                                                                          | 397.7   | 422.9   |
| Area(mAU-s)                                                                         | 40772.4 | 41814.7 | Area(mAU-s)                                                                          | 20800.6 | 30013.7 |
| Area%                                                                               | 49.369  | 50.631  | Area%                                                                                | 40.935  | 59.065  |
| 40% ee ( <i>R</i> )- $\text{H}_8\text{-BINOL}$                                      |         |         | 60% ee ( <i>R</i> )- $\text{H}_8\text{-BINOL}$                                       |         |         |
|  |         |         |  |         |         |
| Peak No.                                                                            | 1       | 2       | Peak No.                                                                             | 1       | 2       |
| Time                                                                                | 24.004  | 28.508  | Time                                                                                 | 24.586  | 29.166  |
| Height(mAU)                                                                         | 520.4   | 748.2   | Height(mAU)                                                                          | 404     | 891.5   |
| Area(mAU-s)                                                                         | 28056.5 | 60700.5 | Area(mAU-s)                                                                          | 22184.6 | 79364.9 |
| Area%                                                                               | 31.610  | 68.390  | Area%                                                                                | 21.8463 | 78.154  |

| 80% ee ( <i>R</i> )-H <sub>8</sub> -BINOL                                         |        |         | 100% ee ( <i>R</i> )-H <sub>8</sub> -BINOL                                         |        |         |
|-----------------------------------------------------------------------------------|--------|---------|------------------------------------------------------------------------------------|--------|---------|
| 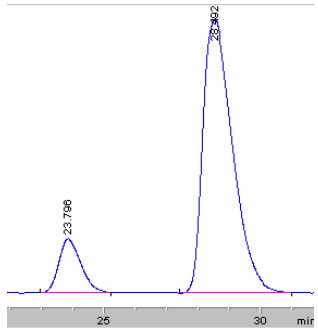 |        |         |  |        |         |
| Peak No.                                                                          | 1      | 2       | Peak No.                                                                           | 1      | 2       |
| Time                                                                              | 23.796 | 28.492  | Time                                                                               | 24.556 | 28.492  |
| Height(mAU)                                                                       | 48.5   | 244.1   | Height(mAU)                                                                        | 81.4   | 1061.6  |
| Area(mAU-s)                                                                       | 2361.7 | 16188.5 | Area(mAU-s)                                                                        | 4055.1 | 92534.7 |
| Area%                                                                             | 12.731 | 87.269  | Area%                                                                              | 4.198  | 95.802  |

### III.2. Ee Values of (*R*)-9g of Linear Effect Study

| Entry | ( <i>R</i> )-H <sub>8</sub> BINOL<br>(mmol) | <i>Rac</i> -H <sub>8</sub> BINOL<br>(mmol) | ee of ( <i>R</i> )-H <sub>8</sub> -BINOL<br>(%) | Ee of ( <i>R</i> )-9g<br>(%) |
|-------|---------------------------------------------|--------------------------------------------|-------------------------------------------------|------------------------------|
| 1     | 0                                           | 0.050                                      | 0                                               | 1.3                          |
| 2     | 0.010                                       | 0.040                                      | 20                                              | 18.1                         |
| 3     | 0.020                                       | 0.030                                      | 40                                              | 36.8                         |
| 4     | 0.030                                       | 0.020                                      | 60                                              | 56.3                         |
| 5     | 0.040                                       | 0.010                                      | 80                                              | 74.5                         |
| 6     | 0.050                                       | -                                          | 100                                             | 91.6                         |

### III.3. The Reaction Condition and HPLC Chromatogram of the Autocatalysis Study

|                                                                                                                                                                                                       |        |                                                                                      |
|-------------------------------------------------------------------------------------------------------------------------------------------------------------------------------------------------------|--------|--------------------------------------------------------------------------------------|
| 0.25 mmol ( <i>R</i> )-9g + 0.60 mmol PhTi(O- <i>i</i> -Pr)<br>followed by an addition of 0.25 mmol 8g.<br>The reaction time was 2 h to give a 96%<br>conversion of ( <i>R</i> )-9g with an 84.7% ee. |        | 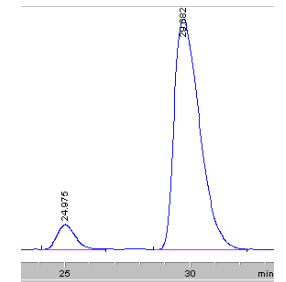 |
| Peak No.                                                                                                                                                                                              | 1      | 2                                                                                    |
| Time                                                                                                                                                                                                  | 24.975 | 29.682                                                                               |
| Height(mAU)                                                                                                                                                                                           | 32.7   | 295                                                                                  |
| Area(mAU-s)                                                                                                                                                                                           | 1730.1 | 20832.1                                                                              |
| Area%                                                                                                                                                                                                 | 7.668  | 92.332                                                                               |

#### IV. References

1. H.-T. Yang, S. Zhou, F.-S. Chang, C.-R. Chen and H.-M. Gau, *Organometallics* 2009, **28**, 5715.
2. (a) H. Takahashi, T. Kawakita, M. Ohno, M. Yoshioka and S. Kobayashi, *Tetrahedron* 1992, **48**, 5691; (b) W. Brieden, R. Ostwald and P. Knochel, *Angew. Chem., Int. Ed. Engl.* 1993, **32**, 582; (c) S. Pritchett, P. Gantzel and P. J. Walsh, *Organometallics* 1997, **16**, 5130.
3. J.-S. You, M.-Y. Shao and H.-M. Gau, *Organometallics* 2000, **19**, 3368.
4. (a) B. Schmidt and D. Seebach, *Angew. Chem., Int. Ed. Engl.* 1991, **30**, 99; (b) D. Seebach, D. A. Plattner, A. K. Beck, Y. M. Wang and D. Hunziker, *Helv. Chim. Acta* 1992, **75**, 2171.
5. K. M. Waltz, P.J. Carroll and P. J. Walsh, *Organometallics* 2004, **23**, 127.
6. K.-H. Wu and H.-M. Gau, *J. Am. Chem. Soc.* 2006, **128**, 14808.
7. C. Bolm and J. Rudolph, *J. Am. Chem. Soc.* 2002, **124**, 14850.
8. J. G. Kim and P. J. Walsh, *Angew. Chem. Int. Ed.* 2006, **45**, 4175.
9. A. M. DeBerardinis, M. Turlington and L. Pu, *Org. Lett.* 2008, **10**, 2709.
